# Supplementary material for: No Evidence of Expectancy Effect on Visuospatial Attention in Cognitive Training with Action Video Games
Source: Research Square preprint supplement (doi:10.21203/rs.3.rs-6938565/v1), 2025-06-26
Supplement: Supplementary file 1 [file 48800869078706fa363a905c.docx]

Appendix – Scripts used in the videos[[1]](#footnote-1)

**Control Group 1.** Many research have been carried out aiming to investigate the different types of attention. These studies have been shown to be important, as they enable a better understanding of individuals' attentional capacities. In addition, a greater understanding of how attention works makes it possible to create psychological tests that can be used in clinical contexts to identify cognitive deficits, such as the evaluation of people with Attention Deficit Hyperactivity Disorder (ADHD), dementia or who may have suffered an accident, such as a Cerebral Vascular Accident (CVA). Attention recruits different sensory pathways, such as hearing, touch, taste, smell, and sight. In addition, attention can receive different classifications depending on how it is used, as in the case of sustained attention, which concerns the ability of individuals to maintain attention for long periods of time, or selective attention, which refers to ability of individuals to select some stimuli in the environment and ignore others. Attention tests are usually associated with long tasks that require a lot of cognitive effort from the participants. To avoid fatigue during the test, you will now take a short break of a few minutes. In order for you to keep your attentional resources working during this break, you will play a game in virtual reality. You will then perform a second step of the attention test. Let's go? Words: 226/ Characters (with space): 1499

**Placebo Group 1.** Did you know that video games, in addition to being fun, can improve your attention skills? This has been a subject of wide investigation within Psychology, where several researchers are investigating the effects of games on human cognition. Many studies have pointed to an improvement in several cognitive abilities in people who play video games, compared to people who do not play video games. These researchers have shown that games can improve players' attention, memory, logical reasoning and perceptual abilities. Not only that, the use of virtual reality can have even more beneficial effects compared to mobile games, computers or video games in general. Aiming to investigate the applicability of the beneficial effects of games, researchers have also investigated the possibility of using video games to treat clinical cases, as in the case of people with some type of brain injury or disability. Thus, people with Alzheimer's disease, Parkinson's disease, various dementias or with some type of injury, as in the case of people who have suffered a stroke, could benefit from treatments that use video games. Considering these findings in the medical and scientific literature, you will now play a game using virtual reality glasses. Previous research has shown that playing games like this for a few minutes makes you think faster and become more attentive. You will then retake computerized tests to assess your attention. Words: 237/ Characters (with space): 1559

**Control Group 2.** Many research have been carried out aiming to investigate the different types of attention. These studies have been shown to be important, as they enable a better understanding of individuals' attentional capacities. In addition, a greater understanding of how attention works makes it possible to create psychological tests that can be used in clinical contexts to identify cognitive deficits, such as the evaluation of people with Attention Deficit Hyperactivity Disorder (ADHD), dementia or who may have suffered an accident, such as a Cerebral Vascular Accident (CVA). Attention recruits different sensory pathways, such as hearing, touch, taste, smell, and sight. In addition, attention can receive different classifications depending on how it is used, as in the case of sustained attention, which concerns the ability of individuals to maintain attention for long periods of time, or selective attention, which refers to ability of individuals to select some stimuli in the environment and ignore others. In order for you to start using your attentional resources, you will play a game in virtual reality. Then you will perform an attention test. Let's go? Words: 203/ Characters (with space): 1356

**Placebo Group 2.** Did you know that video games, in addition to being fun, can improve your attention skills? This has been a subject of wide investigation within Psychology, where several researchers are investigating the effects of games on human cognition. Many studies have pointed to an improvement in several cognitive abilities in people who play video games, compared to people who do not play video games. These researchers have shown that games can improve players' attention, memory, logical reasoning and perceptual abilities. Not only that, the use of virtual reality can have even more beneficial effects compared to mobile games, computers or video games in general. Aiming to investigate the applicability of the beneficial effects of games, researchers have also investigated the possibility of using video games to treat clinical cases, as in the case of people with some type of brain injury or disability. Thus, people with Alzheimer's disease, Parkinson's, various dementias or with some type of injury, as in the case of people who have suffered a stroke, could benefit from treatments that use video games. Considering these findings in the medical and scientific literature, you will now play a game using virtual reality glasses. Previous research has shown that playing games like this for a few minutes makes you think faster and become more attentive. You will then take computerized tests to assess your attention. Words: 235/ Characters (with space): 1557

1. Translated from Brazilian Portuguese. [↑](#footnote-ref-1)
